# Supplementary material for: Psoralen Suppresses Lipid Deposition by Alleviating Insulin Resistance and Promoting Autophagy in Oleate-Induced L02 Cells
Source: MDPI journal article supplement (doi:10.3390/cells11071067), 2022-03-22
Supplement: s1 [file s1]

## Supplementary Table S1

**Table S1.** RT-qPCR primers of *Cpt1a*, *Fasn*, *Srebp1c*, *Gapdh*,  $\beta$ -actin.

| Gene name         | Forward primer(5'to3')     | Reverse primer(5'to3')      |
|-------------------|----------------------------|-----------------------------|
| <i>Cpt1a</i>      | CTACACGGCCGATGTTACGA       | GCCTTTGCAGTGCCCATC          |
| <i>Fasn</i>       | GTCCACCAGCAACATCAGC        | GTTCTCCAGCAAGCCATCTC        |
| <i>Srebp1c</i>    | TGAGGACAGCAAGGCAAAG        | CAGGACAGGCAGAGGAAGAC        |
| <i>Gapdh</i>      | GGAGCGAGATCCCTCCAAAA<br>T  | GGCTGTTGTCATACTTCTCAT<br>GG |
| $\beta$ -actin    | CATGTACGTTGCTATCCAGGC      | CTCCTTAATGTCACGCACGAT       |
| $\alpha$ -tubulin | CCACAGTCATTGATGAAGTT<br>CG | GCTGTGGAAAACCAAGAAGC        |
